# Supplementary material for: Catalysis by framework zinc in silica-based molecular sieves
Source: PubMed Central journal article supplement (PMC5977500; doi:10.1039/c5sc03889h), 2016-01-04
Supplement: SC-007-C5SC03889H-s001.pdf [file SC-007-C5SC03889H-s001.pdf]

## Catalysis by framework zinc in silica-based molecular sieves

### Supporting Information

#### 1. Spectroscopic and catalytic characterization of microporous zincosilicates

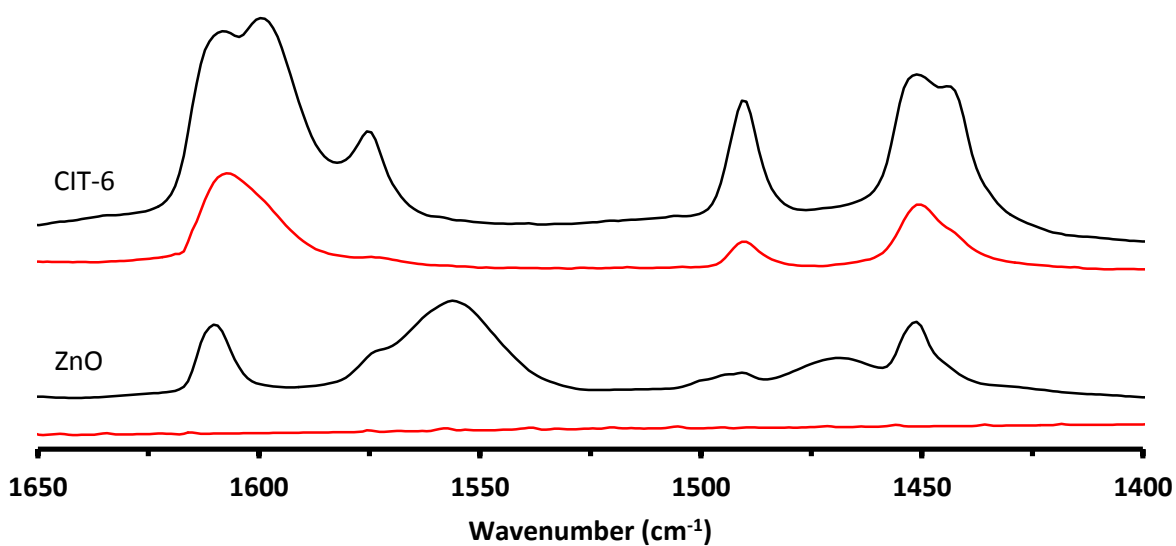

**Fig. S1:** Baseline-corrected IR spectra of pyridine adsorbed on CIT-6 (top) and ZnO (bottom) at 35 °C. Black and red spectra correspond to subsequent desorption under dynamic vacuum for 1h at 100 °C and 300 °C, respectively.

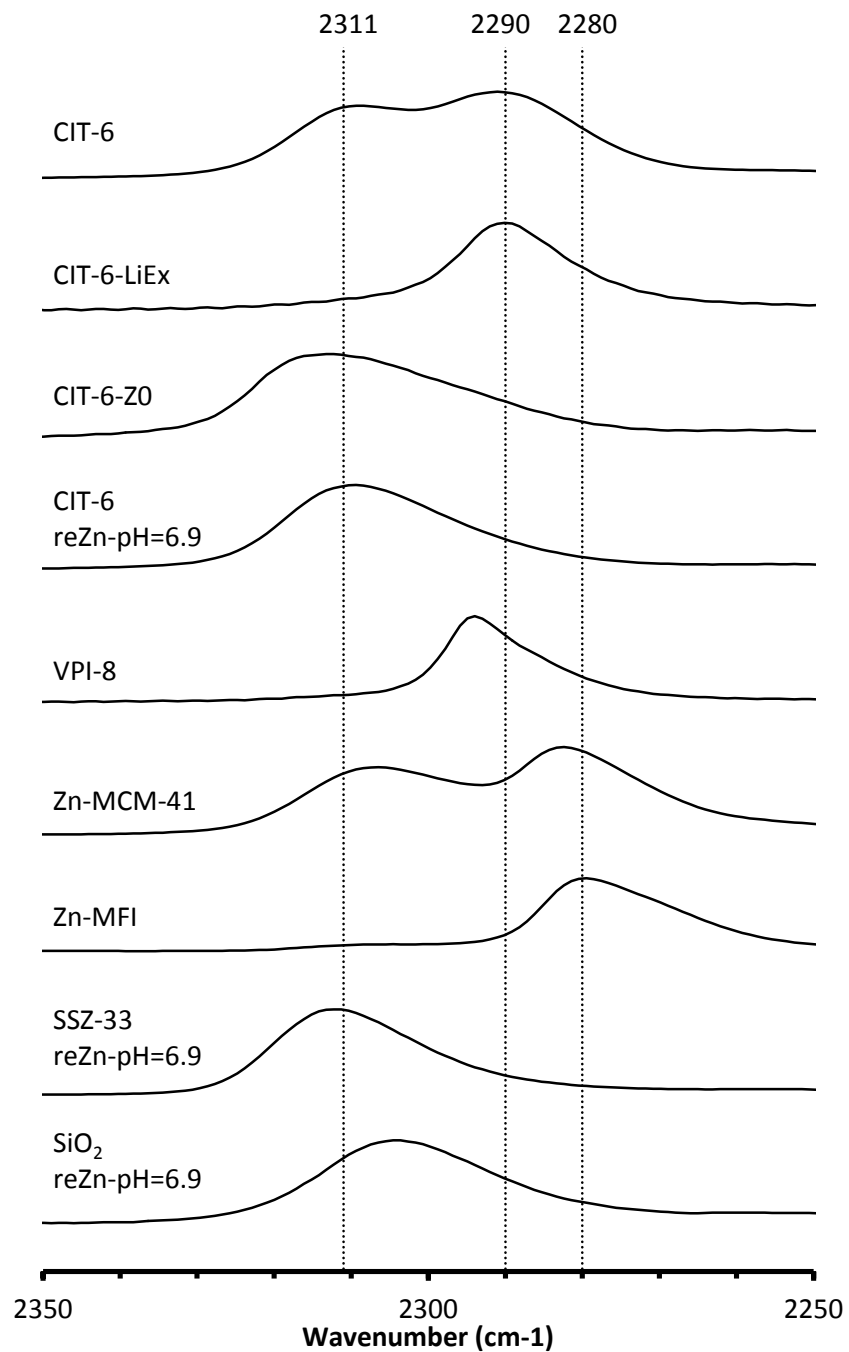

**Fig. S2:** Baseline-corrected, normalized IR spectra of CD<sub>3</sub>CN adsorbed at 35 °C on (from top to bottom): CIT-6, CIT-6-LiEx, CIT-6-ZO, CIT-6-reZn-pH=6.9, VPI-8, Zn-MCM-41, Zn-MFI, SSZ-33-reZn-pH=6.9, and SiO<sub>2</sub>-reZn-pH=6.9. Spectra were collected after desorption at 100 °C for 1h.

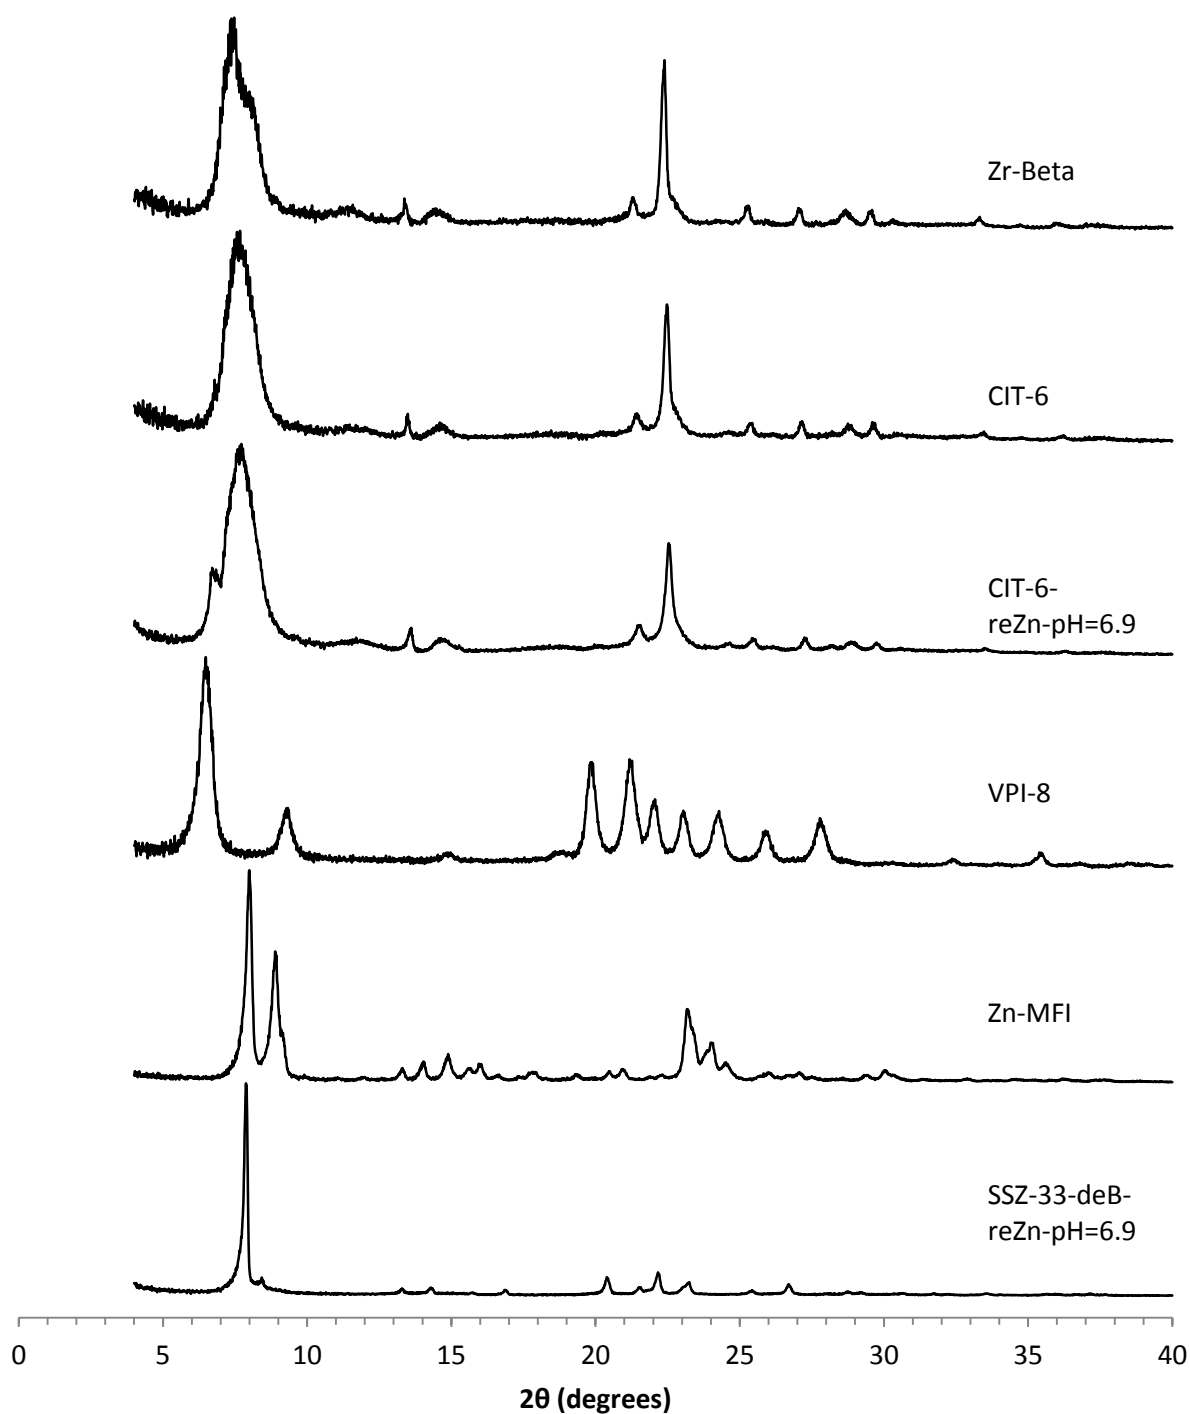

**Fig. S3:** Normalized powder XRD data for selected microporous materials (from top to bottom): Zr-Beta, CIT-6, CIT-6-reZn-pH=6.9, VPI-8, Zn-MFI, and SSZ-33-reZn-pH=6.9. All materials have been calcined. XRD pattern of the parent CIT-6 sample does not have noticeable VPI-8 peaks, but, upon 1M H<sub>2</sub>SO<sub>4</sub> treatment, Zn-reinsertion, and calcination, a shoulder in the low angle peak of \*BEA becomes apparent, indicating the presence of VPI-8 (VET framework) as a minor phase impurity. Crystal aggregates of VPI-8 morphology are also observed among \*BEA crystals. The increase in the prominence of the VET peak in the powder pattern may be associated with selective partial degradation of the \*BEA framework in the treatment of the sample, as it is a less dense structure.

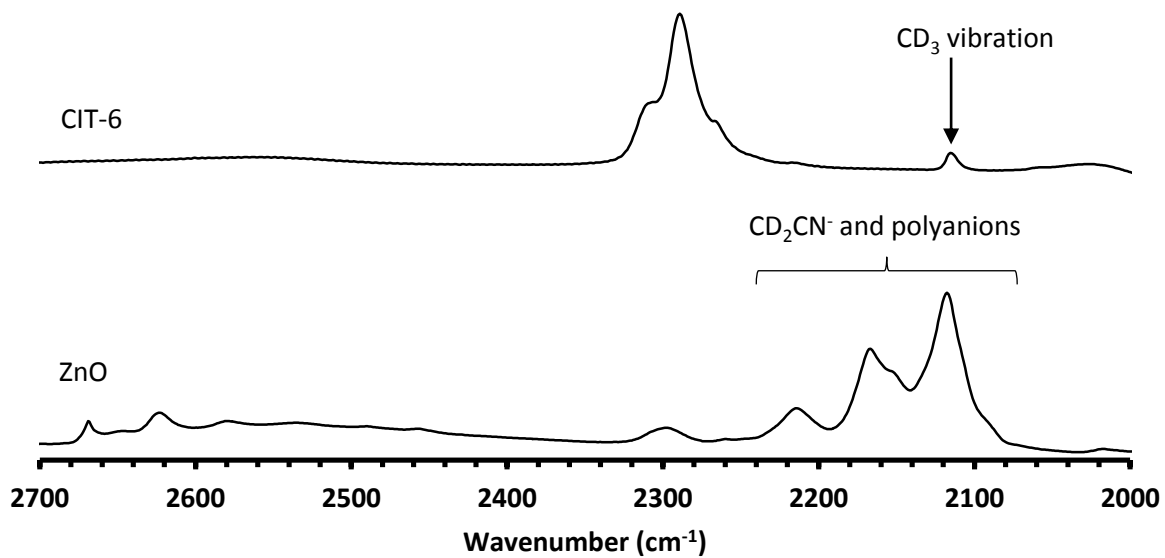

**Fig. S4:** Baseline-corrected, normalized IR spectra of CD<sub>3</sub>CN adsorbed at 35 °C on CIT-6 (top) and ZnO (bottom). A CD<sub>3</sub> vibration band ca. 2115 cm<sup>-1</sup> is found in all spectra of CD<sub>3</sub>CN adsorbed on SiO<sub>2</sub> materials, and is not a shifted CN band. Spectra were collected after desorption at 35 °C for 1h.

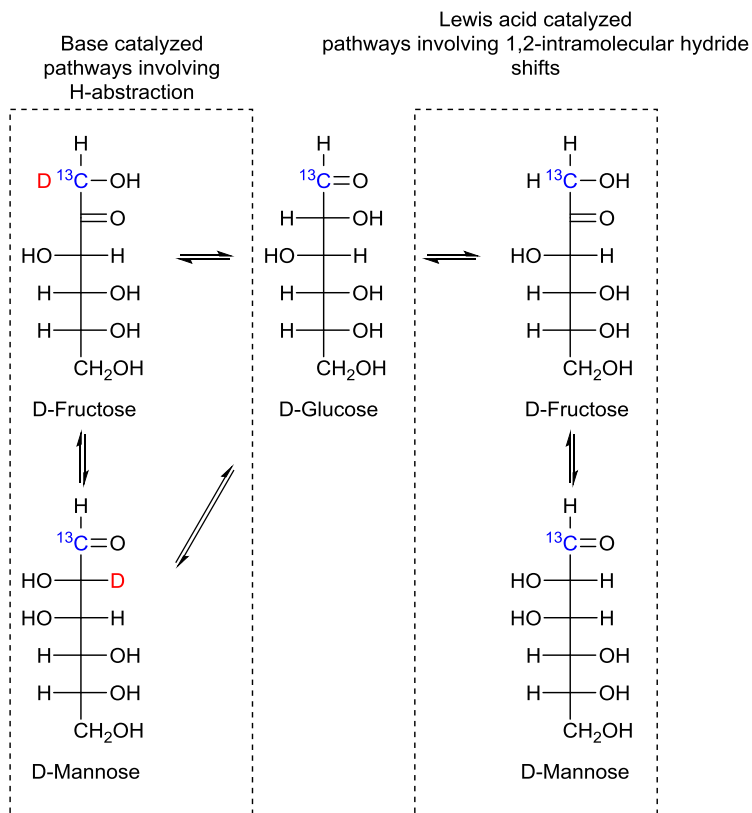

**Scheme S1:** Illustration of glucose isomerization mechanisms promoted by bases and Lewis acids. For reactions performed in deuterated solvents ( $D_2O$  or  $MeOD$ ), deuterium incorporation is expected for products formed through enolate intermediates, but not through intramolecular hydride shifts. The use of  $^{13}C$ -C1-glucose enables product analysis without the need for fractionation.

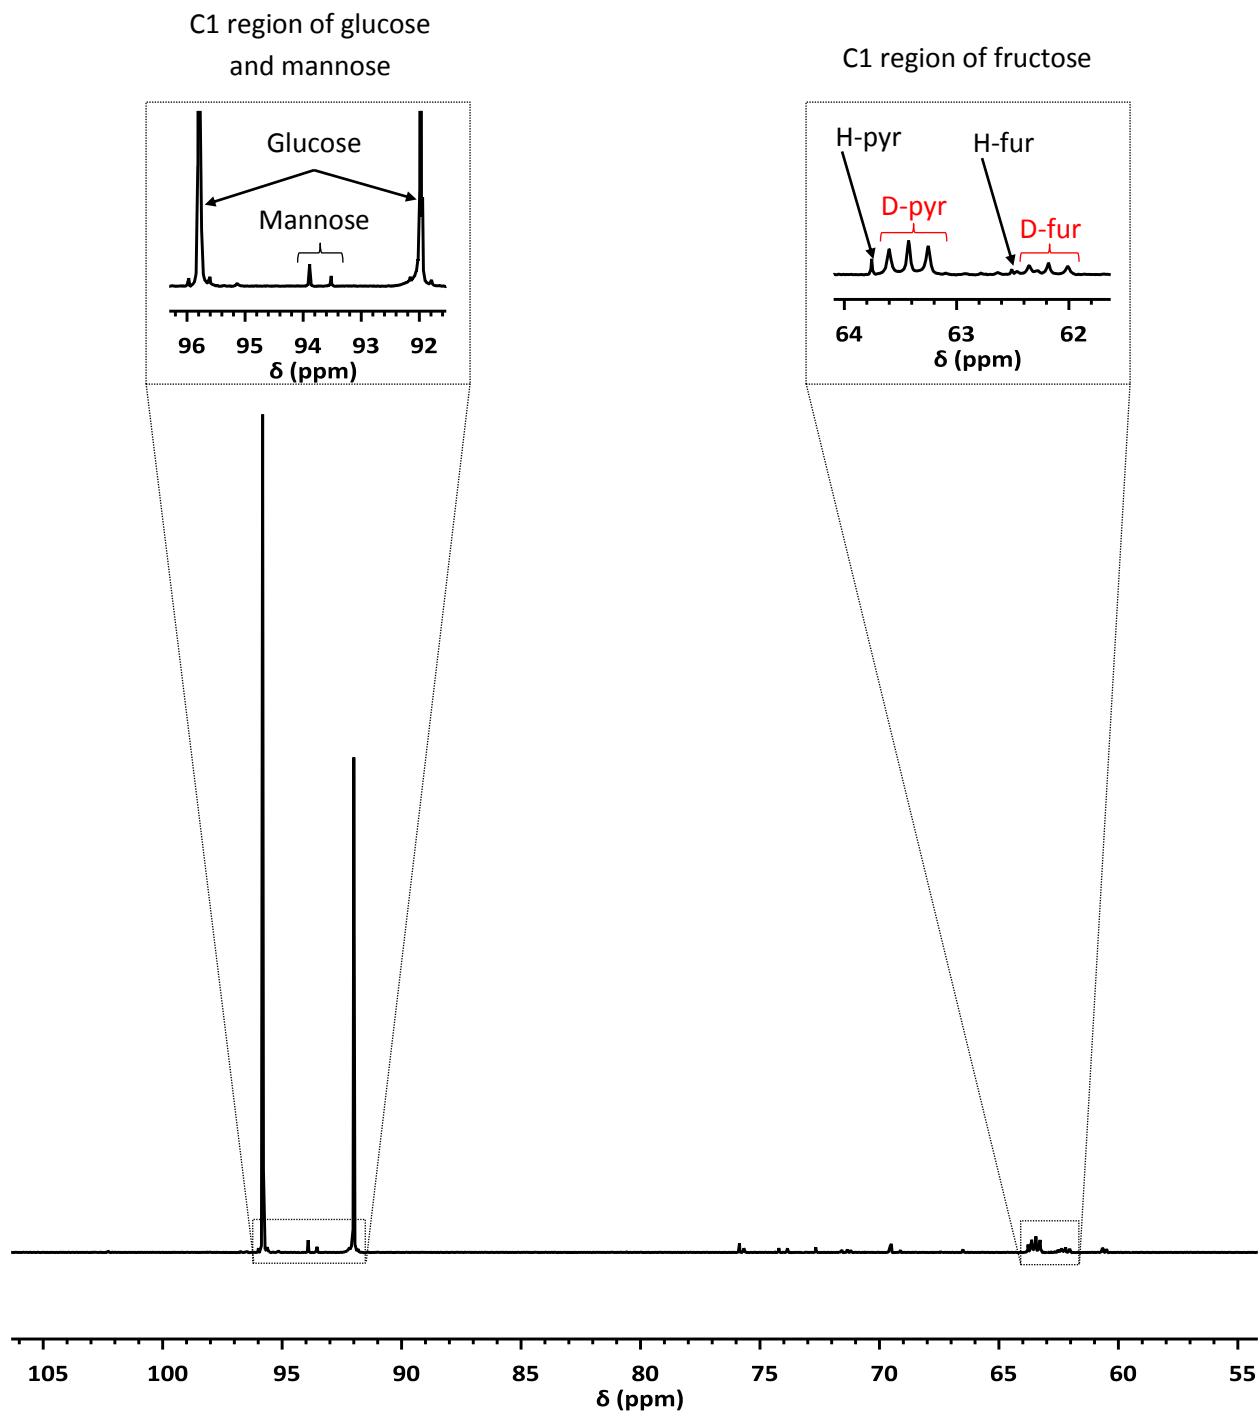

**Fig. S5:**  $^{13}\text{C}$  NMR spectrum of unseparated reactant ( $^{13}\text{C}$ -C1-glucose) and the products generated by CIT-6 at 100 °C after a 1h reaction in  $\text{D}_2\text{O}$ . The abbreviations “pyr” and “fur” stand for pyranose and furanose, respectively. Incorporation of deuterium at C1 position of fructose, as evidence by appearance of low-intensity triplets, indicates a base-catalyzed mechanism. The presence of  $^1\text{H}$ -form of fructose likely originates from the small fraction of  $^1\text{H}$  impurity in  $\text{D}_2\text{O}$  solvent, but could also arise from a small contribution from a hydride shift mechanism. Unlabeled peaks correspond to natural abundance  $^{13}\text{C}$  (~1%) occurring in glucose C2-C6 positions.

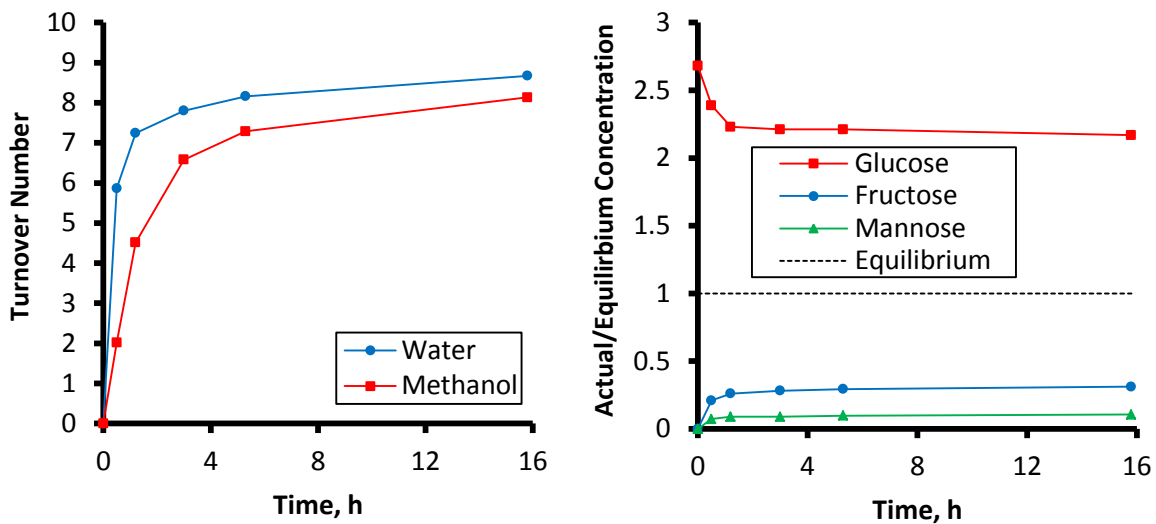

**Fig. S6:** Left: Stagnation of TON for glucose reactions catalyzed by CIT-6 in water and methanol solvents, based on total Zn content. Right: Approach to equilibrium distribution of sugars in water. Reaction conditions: 100 °C, 1% (wt/wt) glucose, 1:50 Zn:glucose initial molar ratio.

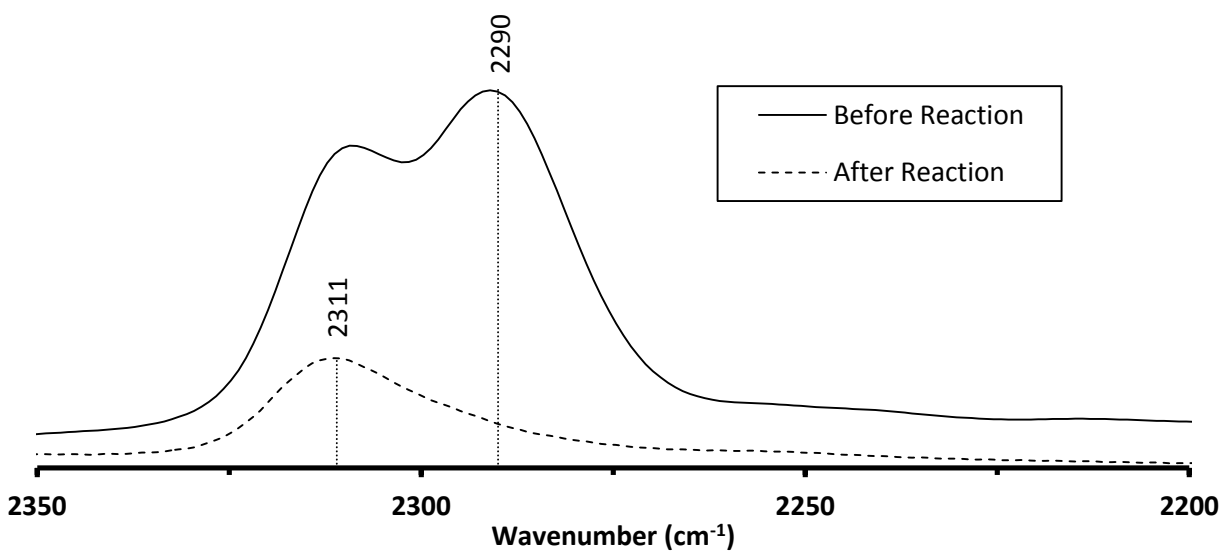

**Fig. S7:** Baseline-corrected IR spectra of CD<sub>3</sub>CN adsorbed at 35 °C on CIT-6 before and after glucose reaction in water. Spectra were collected after desorption at 100 °C for 1h. Spectra are not quantitative and total Zn content (based on EDS measurements) falls by 35% after reaction.

| Reaction | Catalyst                                         | Si/M ratio                           | T (°C) | Time (h) | X <sub>MMFC</sub> (%) | Y <sub>MMBC</sub> (%) | S <sub>MMBC</sub> (%) |
|----------|--------------------------------------------------|--------------------------------------|--------|----------|-----------------------|-----------------------|-----------------------|
| 1        | CIT-6                                            | 12.2 ± 0.9                           | 150    | 12       | 18.1                  | 10.1                  | 55.7                  |
| 2        | CIT-6                                            | 12.2 ± 0.9                           | 170    | 12       | 34.5                  | 21.5                  | 62.3                  |
| 3        | CIT-6                                            | 12.2 ± 0.9                           | 170    | 18       | 45.8                  | 28.4                  | 62.0                  |
| 4        | CIT-6                                            | 12.2 ± 0.9                           | 190    | 6        | 30.5                  | 15.6                  | 51.0                  |
| 5        | catalyst recovered after reaction 4 <sup>1</sup> | n.d.                                 | 190    | 6        | 18.8                  | 10.2                  | 54.4                  |
| 6        | CIT-6                                            | 12.2 ± 0.9                           | 190    | 12       | 43.6                  | 25.7                  | 58.8                  |
| 7        | CIT-6                                            | 12.2 ± 0.9                           | 230    | 6        | 41.6                  | 9.9                   | 23.8                  |
| 8        | CIT-6 <sup>2</sup>                               | 12.2 ± 0.9                           | 190    | 6        | *                     | *                     | *                     |
| 9        | Bulk ZnO                                         | -                                    | 190    | 6        | *                     | *                     | *                     |
| 10       | CIT-6-LiEx                                       | 10.9 ± 2.5                           | 190    | 6        | 4.7                   | 1.6                   | 34.8                  |
| 11       | CIT-6-ZO                                         | 21.3 ± 4.2                           | 190    | 6        | 51.0                  | 21.9                  | 42.9                  |
| 12       | Zn MCM-41                                        | 21.6 ± 8.0                           | 190    | 6        | 4.3                   | *                     | *                     |
| 13       | Zn MFI                                           | 38.8 ± 3.2                           | 190    | 12       | 6.8                   | *                     | *                     |
| 14       | VPI-8                                            | 18.3 ± 1.8                           | 190    | 6        | 5.1                   | *                     | *                     |
| 15       | SSZ-33-deB-re-Zn-pH=6.9                          | 12.6 ± 0.9                           | 190    | 12       | 10.6                  | 0.4                   | 4.1                   |
| 16       | Zn-Na-Al-Beta                                    | 31.0 ± 0.7 Si/Zn<br>12.6 ± 0.1 Si/Al | 190    | 6        | 89                    | 4.7                   | 5.2                   |
| 17       | CIT-6-de-Zn                                      | 188 ± 17                             | 190    | 6        | 26.6                  | 3.9                   | 14.7                  |
| 18       | CIT-6-re-Zn-pH=5.1                               | 180 ± 57                             | 190    | 6        | 53.1                  | 11.9                  | 22.5                  |
| 19       | CIT-6-re-Zn-pH=6.0                               | 21.8 ± 1.6                           | 190    | 6        | 52.5                  | 22.2                  | 42.4                  |
| 20       | CIT-6-re-Zn-pH=6.9                               | 8.5 ± 0.3                            | 190    | 6        | 50.7                  | 24.5                  | 48.2                  |
| 21       | CIT-6-re-Zn-pH=7.4                               | 5.9 ± 0.2                            | 190    | 6        | 47.0                  | 21.2                  | 44.9                  |
| 22       | Zr-Beta                                          | 79 ± 9                               | 190    | 6        | 44.7                  | 18.9                  | 42.3                  |

**Table S1:** Summary of results for DA cycloaddition-dehydration reaction of MMFC and ethylene. Reaction conditions: catalyst, temperature, and catalyst as indicated; 0.1 M MMFC in 10 mL heptane; 100 mg of catalyst; and 35 bar C<sub>2</sub>H<sub>2</sub> at 25 °C.

<sup>1</sup> Catalyst washed with heptane, and reused without recalcination

<sup>2</sup> Dioxane solvent (0.1 M MMFC in 10 mL)

\* Below detection limit for conversion or yield (0.4%)

n.d. not determined



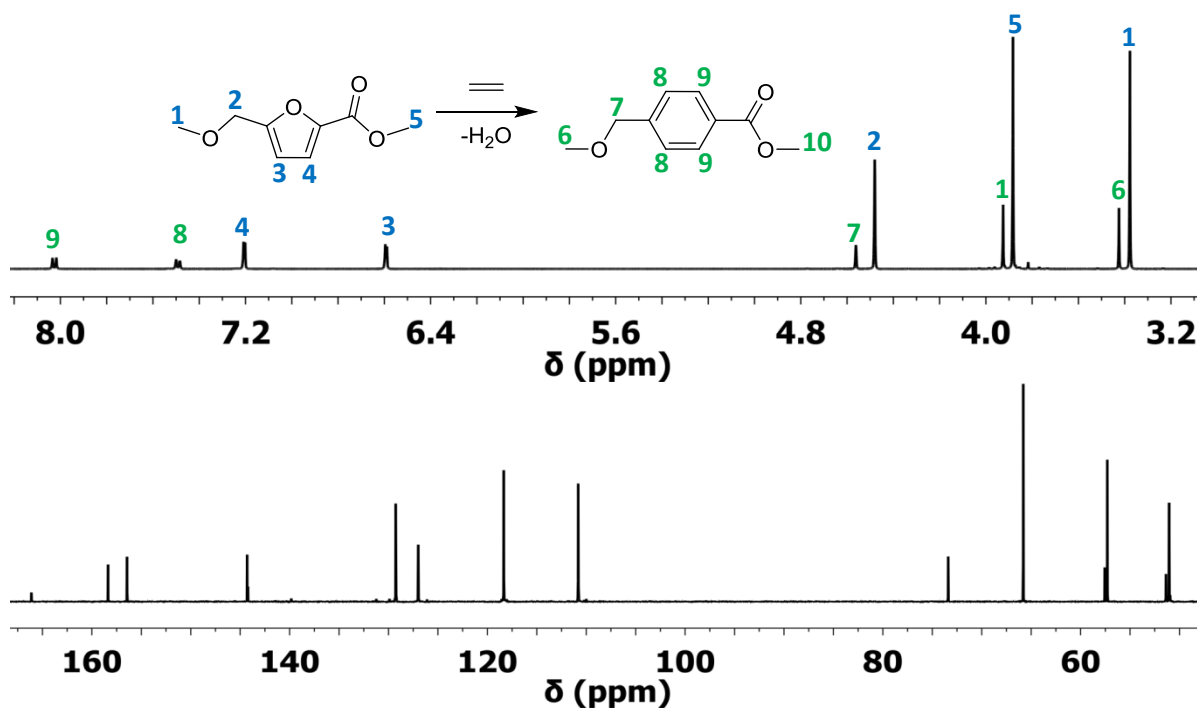

**Fig. S8:**  $^1H$  (top) and  $^{13}C$  (bottom) NMR spectra of unseparated reactant (MMFC) and the products generated by CIT-6 at 190 °C after a 6h DA cycloaddition-dehydration reaction in heptane.

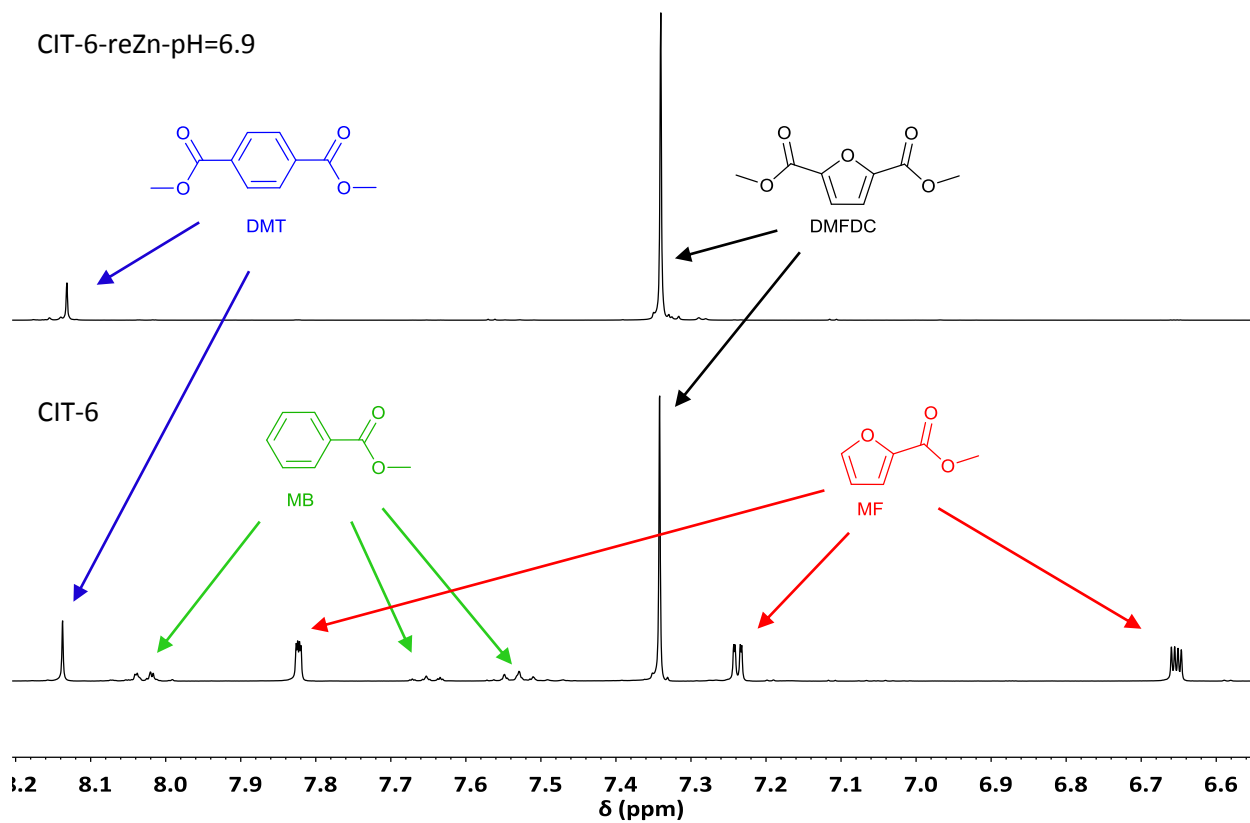

**Fig. S9:** <sup>1</sup>H NMR spectrum of unseparated reactant (DMFDC) and the products (DMT, MB, and MF) generated by CIT-6 (bottom) and CIT-6-reZn-pH=6.9 (top) at 190 °C after a 12h DA cycloaddition-dehydration reaction in heptane.

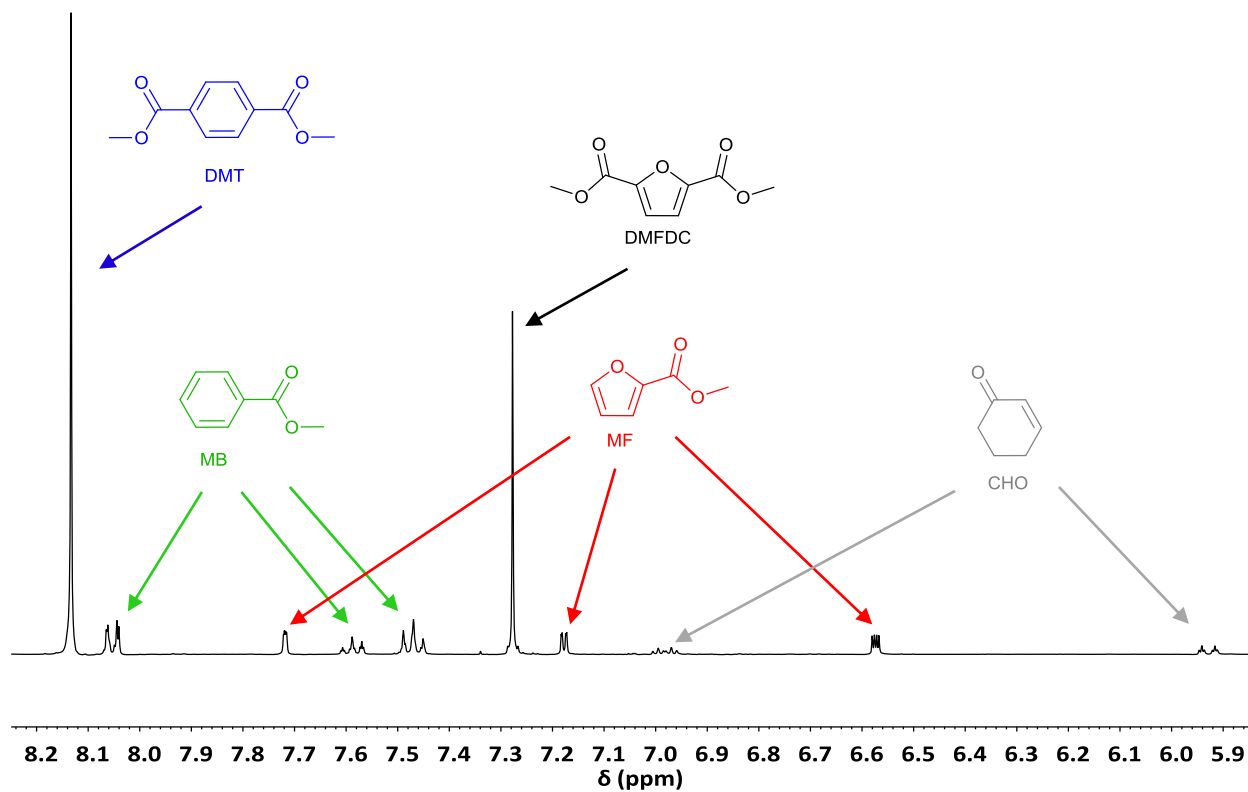

**Fig. S10:**  $^1\text{H}$  NMR spectrum of unseparated reactant (DMFDC) and the products (DMT, MB, MF, and CHO) generated by CIT-6-reZn-pH=6.9 at 230 °C after a 12h DA cycloaddition-dehydration reaction in heptane.

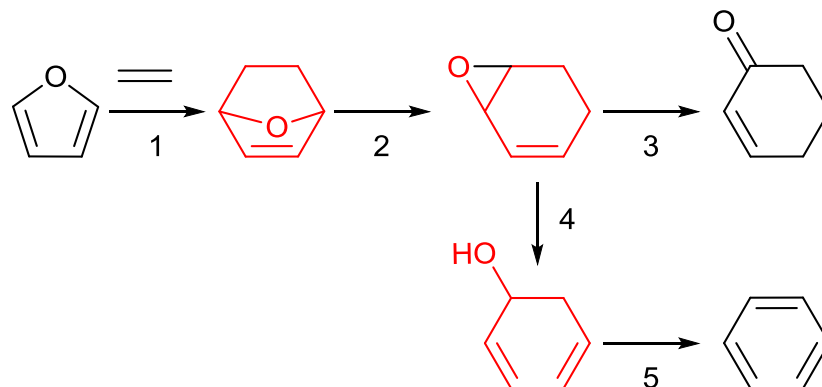

**Scheme S2:** Proposed mechanism of formation of 2-cyclohexenone and benzene from furan. Step 1 is a Diels-Alder cycloaddition step. Step 2 is a Lewis acid promoted rearrangement to an epoxide proposed for the dimethyl furan analog of the oxa-norbornene cycloadduct. Step 3 is a Lewis acid promoted hydride shift that isomerizes the epoxide to the enone. Benzene is hypothesized to form through steps 4 and 5 that are also proposed for the analogous dehydrative-aromatization of dimethyl furan to p-xylene. Intermediates highlighted in red were not detected in this study.

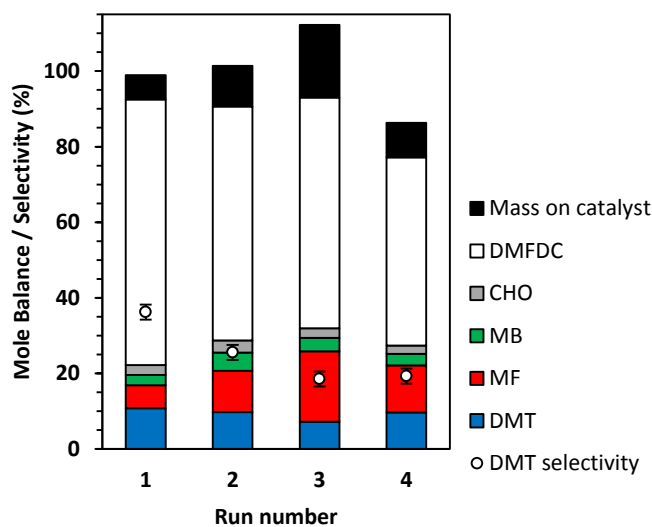

**Fig. S11:** Catalyst recycle experiments for Diels-Alder cycloaddition-dehydration reactions of DMFDC catalyzed by CIT-6-re-Zn-pH=6.9 at 210 °C. Run 1 uses as-made CIT-6-re-Zn-pH=6.9; Run 2 uses catalyst recovered after Run 1, triply washed by acetone, and dried; Run 3 uses catalyst recovered after Run 2, triply washed by acetone, and dried; Run 4 uses catalyst recovered after Run 3, triply washed by acetone, dried, and calcined. Resulting yields (%) of DMT, MF, MB, CHO, and DMFDC are calculated as ratio of moles formed to initial moles of DMFDC. Mass on catalyst (%) is expressed as ratio of combustible mass on catalyst (measured by TGA) to initial mass of DMFDC. Reaction conditions: reagent and solvent ratios were adjusted to keep constant ratio to inorganic catalyst content between runs; 35 bar C<sub>2</sub>H<sub>2</sub> at 25 °C, 12h reaction time.

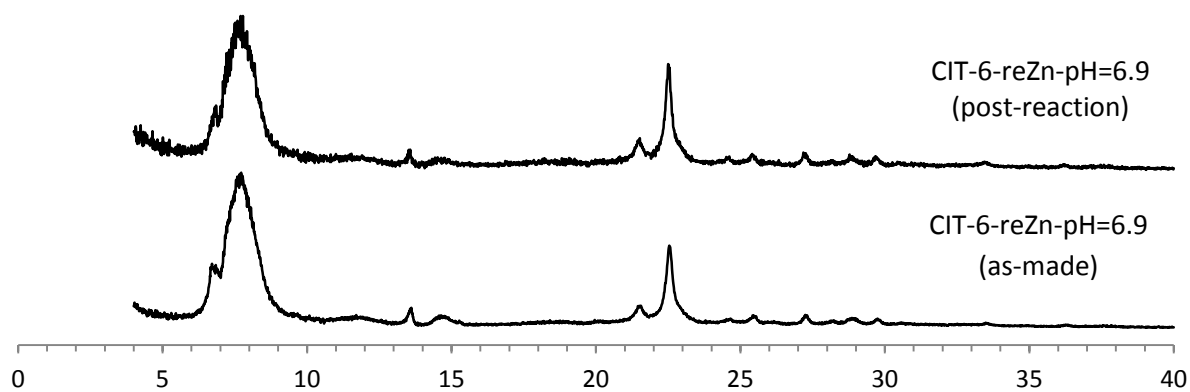

**Fig. S12:** Normalized powder XRD data for as-made CIT-6-reZn-pH=6.9 (bottom), and CIT-6-reZn-pH=6.9 recovered after Run 3 in Fig. S11 (top).

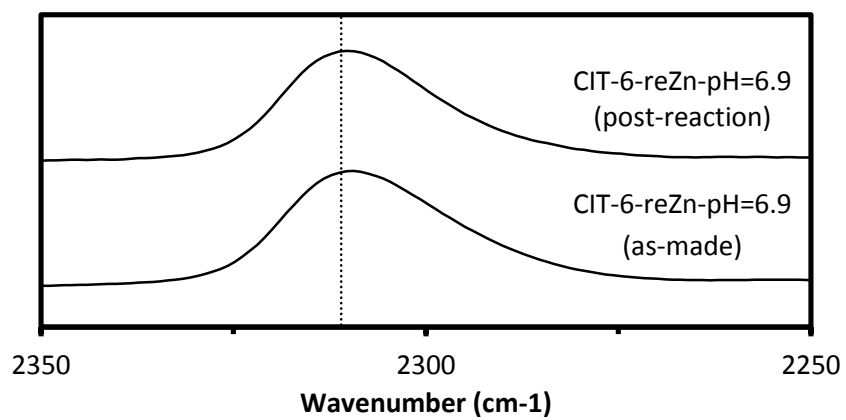

**Fig. S13:** Baseline-corrected, normalized IR spectra of  $\text{CD}_3\text{CN}$  adsorbed at 35 °C on as-made CIT-6-reZn-pH=6.9 (bottom), and CIT-6-reZn-pH=6.9 recovered after Run 3 in Fig. S11 (top). Spectra were collected after desorption at 100 °C for 1h.

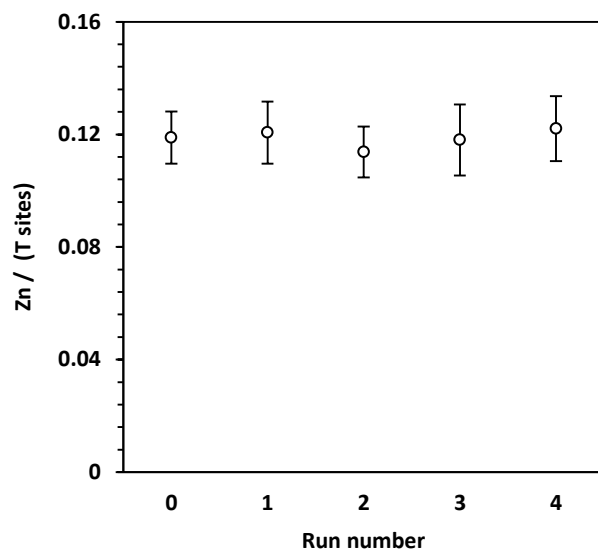

**Fig. S14:** Zn content (as measured by EDS) of catalysts recovered after each run shown in Fig. S11. Run 0 corresponds to as-made CIT-6-re-Zn-pH=6.9 before Run 1; Run 1 uses as-made CIT-6-re-Zn-pH=6.9; Run 2 uses catalyst recovered after Run 1, triply washed by acetone, and dried; Run 3 uses catalyst recovered after Run 2, triply washed by acetone, and dried; Run 4 uses catalyst recovered after Run 3, triply washed by acetone, dried, and calcined.
